# Supplementary material
Source: PubMed Central journal article supplement (PMC10870968)

**Supplementary Figure 1. Positive and negative probes for RNAscope**

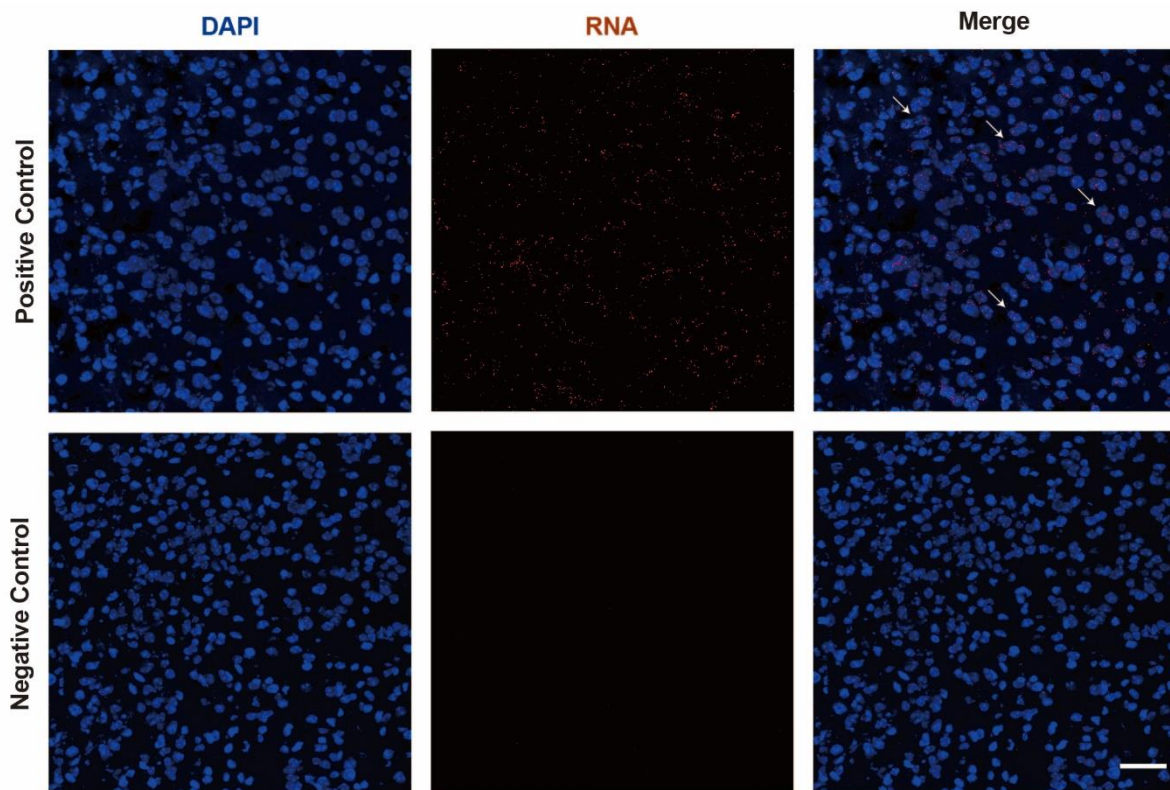

Representative RNAscope images of positive RNA (red) and negative RNA in the hemorrhagic perifocal area at day 3 of ICH. Scale bar = 50  $\mu$ m. Arrows indicated the colocalization of positive RNA with DPAI.

**Supplementary Figure 2. The construction of  $Aldh111^{CreERT2+/-}; CCL5^{ff}$  mice and verification of CCL5 knockout efficiency**

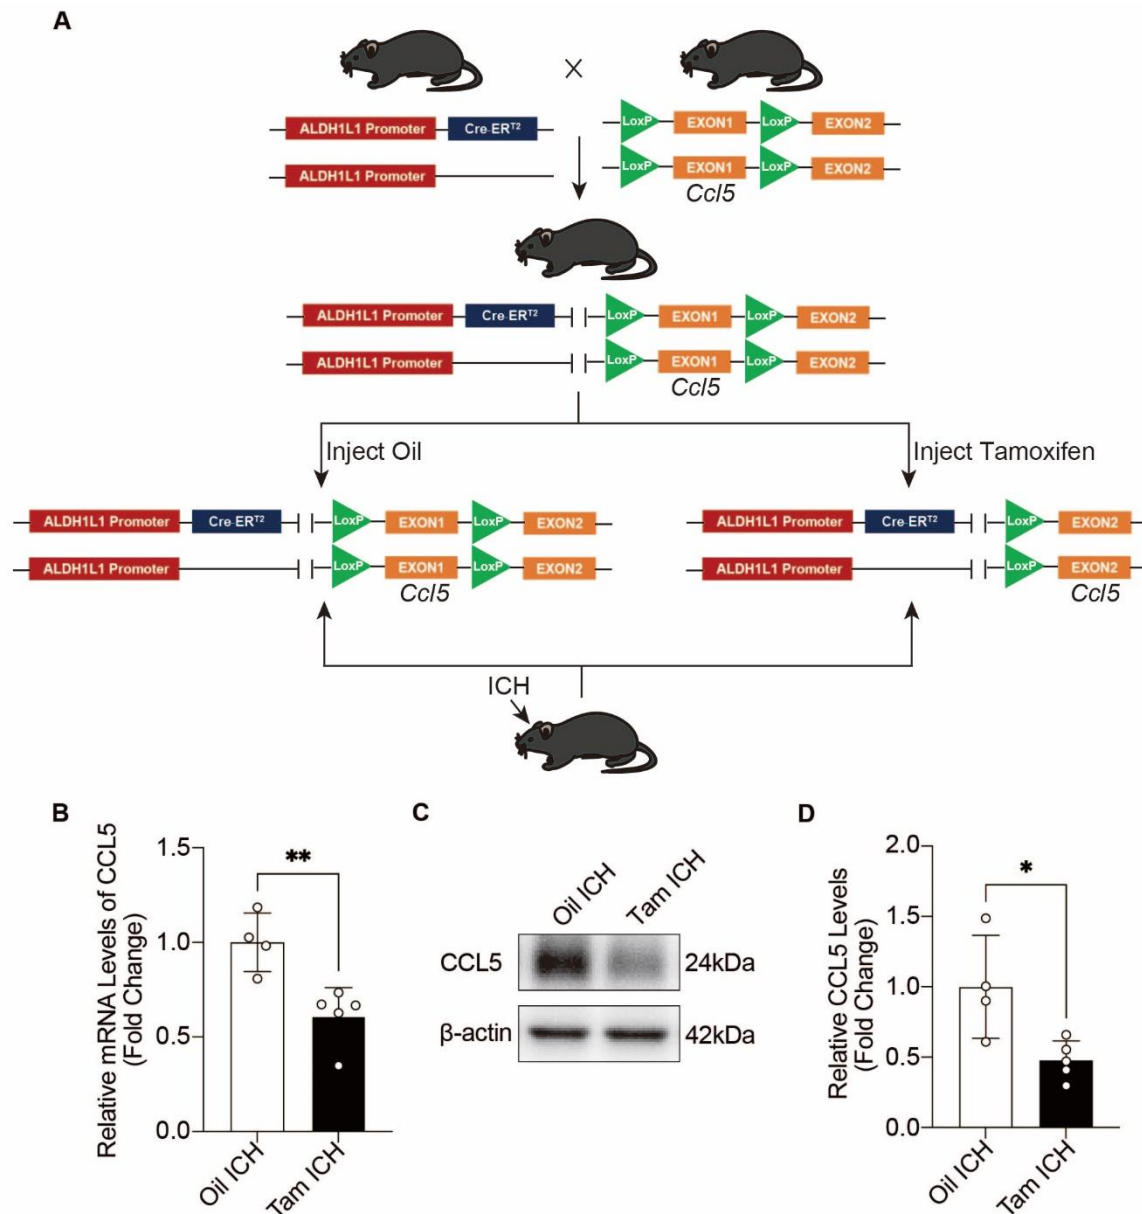

**A.** Schematic representation of  $Aldh111^{CreERT2+/-}; CCL5^{ff}$  mice construction. **B.** RT-PCR analysis of CCL5 mRNA expression levels in the hemorrhagic perifocal area at day 3 of ICH in Oil ICH and Tam ICH groups.  $n = 4$  mice in Oil ICH group (3 females, 1 male),  $n = 5$  mice in Tam ICH group (2 females, 3 male). GAPDH was used as an internal control. Two-sided, unpaired Student's test. **C.** Representative immunoblots of CCL5

protein expression levels in the hemorrhagic perifocal area at day 3 of ICH in Oil ICH and Tam ICH groups. **D.** Quantification of CCL5 protein expression levels in the hemorrhagic perifocal area at day 3 of ICH in Oil ICH and Tam ICH groups. n = 4 mice in Oil ICH group (3 female, 1 male), n = 5 mice in Tam ICH group (2 female, 3 male).  $\beta$ -actin was used as an internal control. Two-sided, unpaired Student's test. All data are presented as mean  $\pm$  SD. \* $p$  < 0.05, \*\* $p$  < 0.01.

### Supplementary Figure 3. Knockout of CCL5 in astrocytes did not alter myeloid

#### cell infiltration

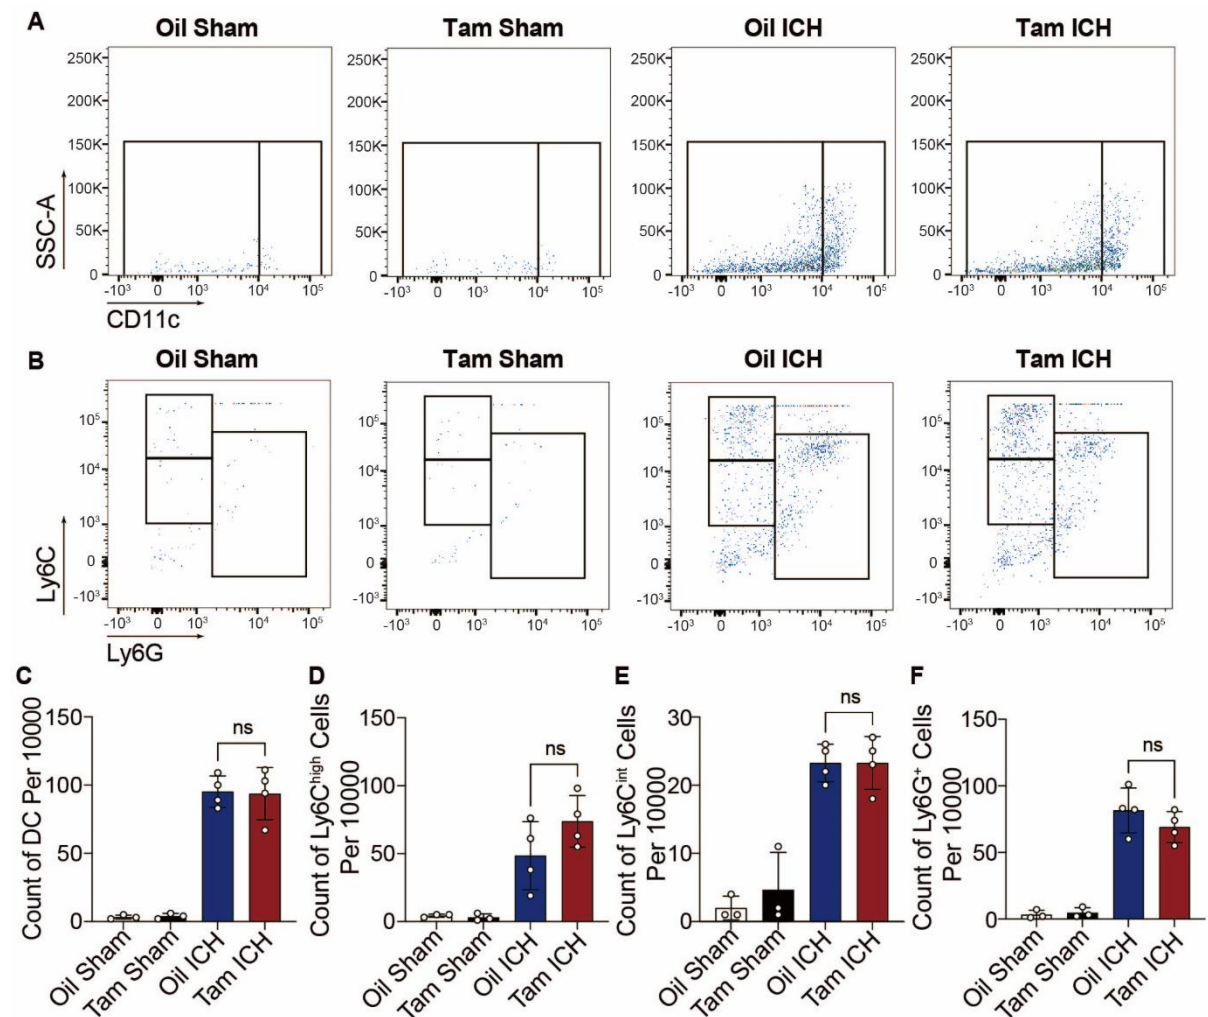

**A, B.** Representative flow cytometry pseudocolor dot plots showed gating strategy of dendritic cells (CD11c<sup>+</sup>) (A), monocytes (Ly6C<sup>high</sup>, Ly6C<sup>int</sup>) (B), and neutrophils (Ly6G<sup>+</sup>) (B) in Oil Sham, Tam Sham, Oil ICH and Tam ICH groups. **C, D, E, F.** The number of dendritic cells (CD11c<sup>+</sup>) (C), monocytes (Ly6C<sup>high</sup>, Ly6C<sup>int</sup>) (D, E), and neutrophils (Ly6G<sup>+</sup>) per 10000 cells in Oil Sham, Tam Sham, Oil ICH and Tam ICH groups. n = 3 mice in Oil Sham and Tam Sham groups (1 female, 2 male), n = 4 mice in Oil ICH and Tam ICH groups (1 female, 3 male). (C, E, F) One-way ANOVA with Tukey's multiple

comparisons test. (D) Brown-Forsythe and Welch ANOVA tests with Dunnett T3 test.

All data are presented as mean  $\pm$  SD. ns, no significance.

**Supplementary Figure 4. Schematic diagram of the flow cytometry gating strategy for infiltrating peripheral immune cells**

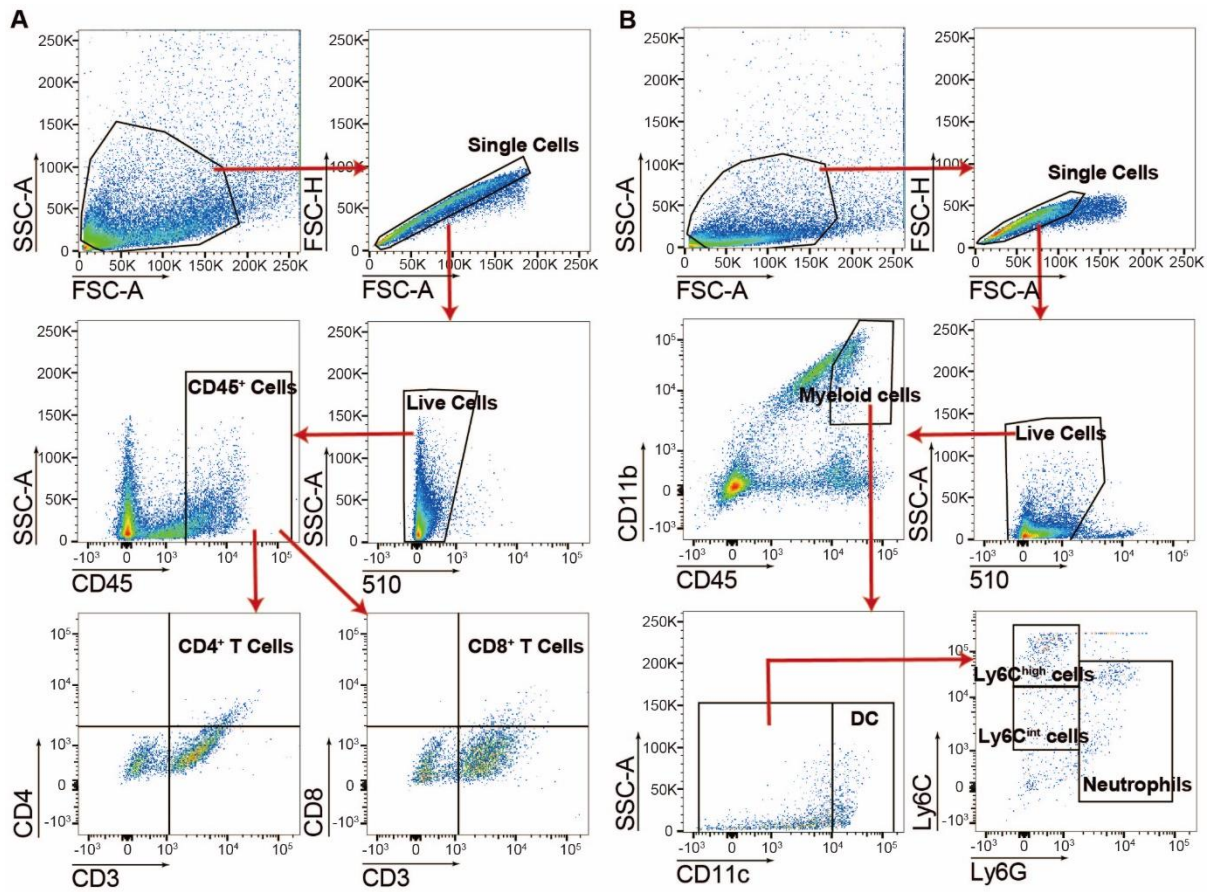

**A, B.** Representative flow cytometry pseudocolor dot plots showed the gating strategy of lymphocytes (A) and myeloid cells (B).

**Supplementary Figure 5. tSNE analysis of infiltrating peripheral immune cells in hemorrhagic stroke brain**

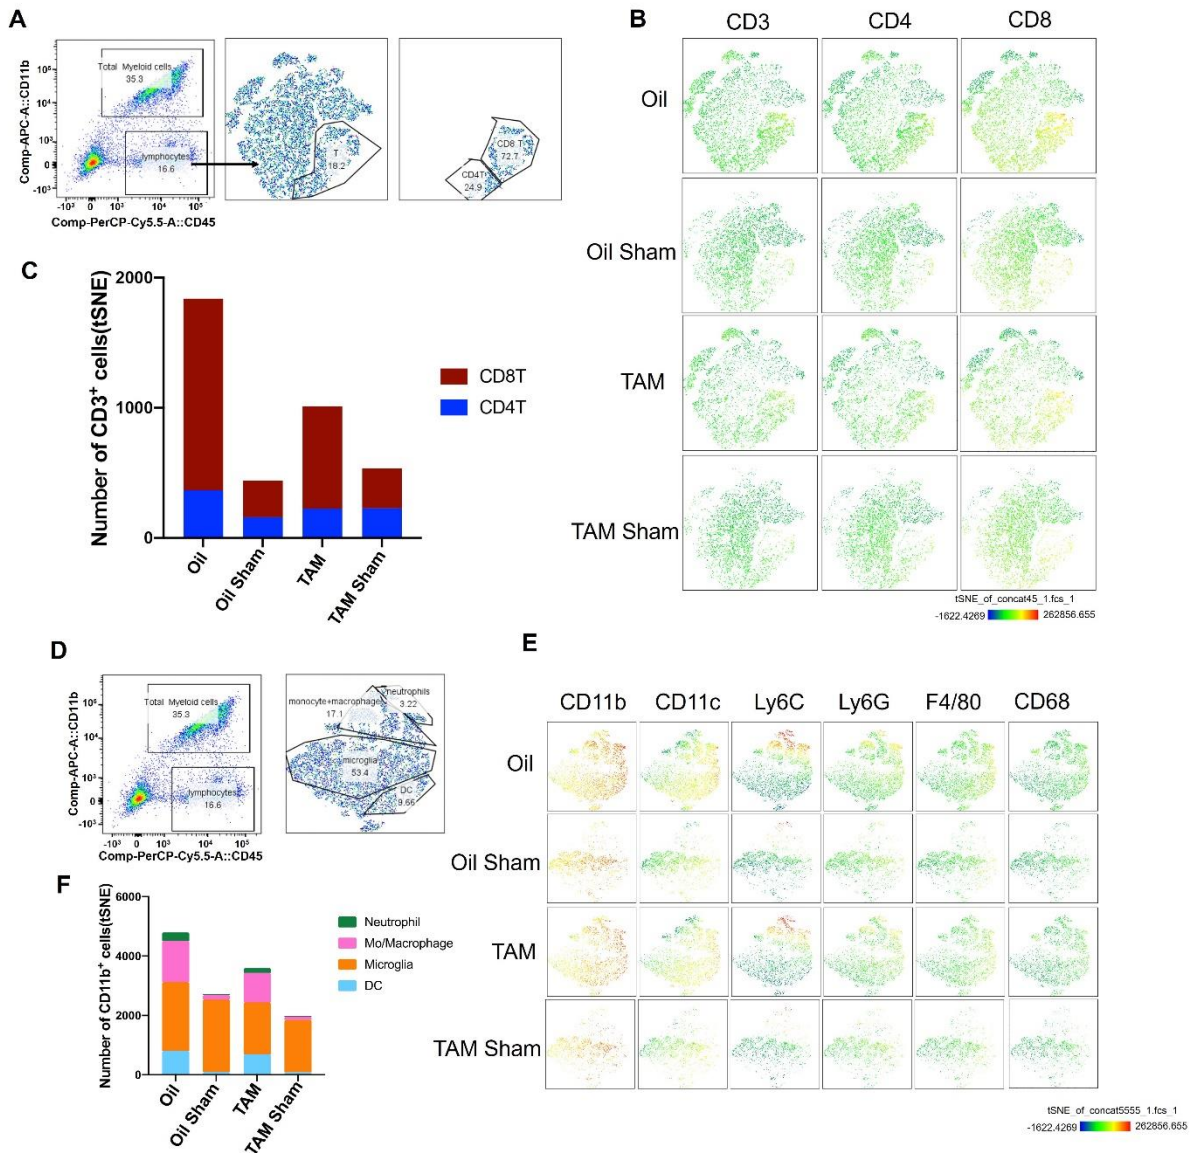

**A.** Gating strategy of Flowjo tSNE analysis of lymphocytes. **B.** tSNE analysis of CD3+ T cells. **C.** Bar graph showed that number of CD3+/CD4+ T cells and CD3+/CD8+ T cells. **D.** Gating strategy of Flowjo tSNE analysis of myeloid cells. **E.** tSNE analysis of CD45+CD11b+ cells. **F.** Bar graph showed that number of

neutrophil, monocyte/macrophage, microglia and DC cells.

**Supplementary Figure 6. Expression of CCR1, CCR3, CCR4 and CCR5 in CD4<sup>+</sup> T and CD 8<sup>+</sup> T cells**

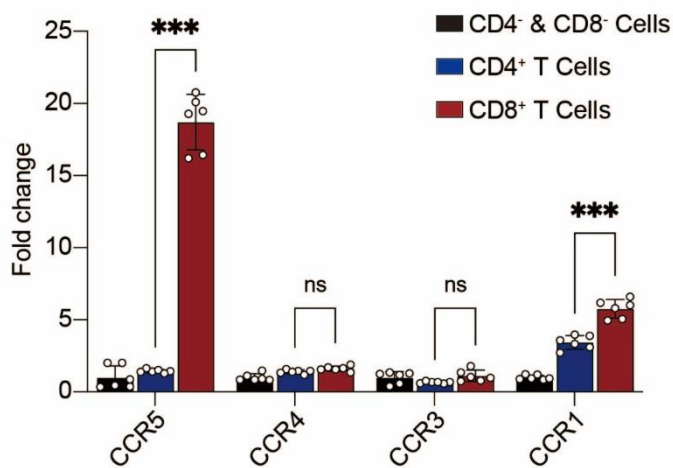

RT-PCR analysis of CCR1, CCR3, CCR4 and CCR5 in different immune cells at 3 days after ICH. n = 6 mice per group (all male). GAPDH was used as an internal control. Two-way ANOVA with Bonferroni multiple comparisons test. All data are presented as mean  $\pm$  SD. \*\*\* $p < 0.001$ .



**Supplementary Figure 7. Schematic representation of the location of ICH**

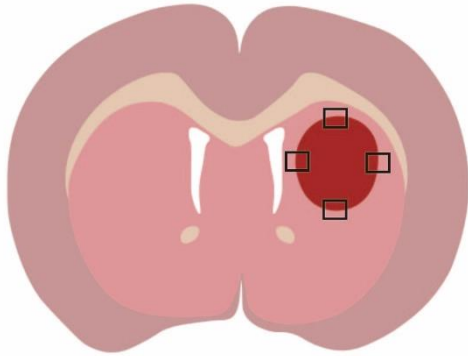

Location of the peri-hemorrhagic zone.

**Supplementary Figure 8. Specific knockout of CCL5 in astrocytes reduced neuronal apoptosis**

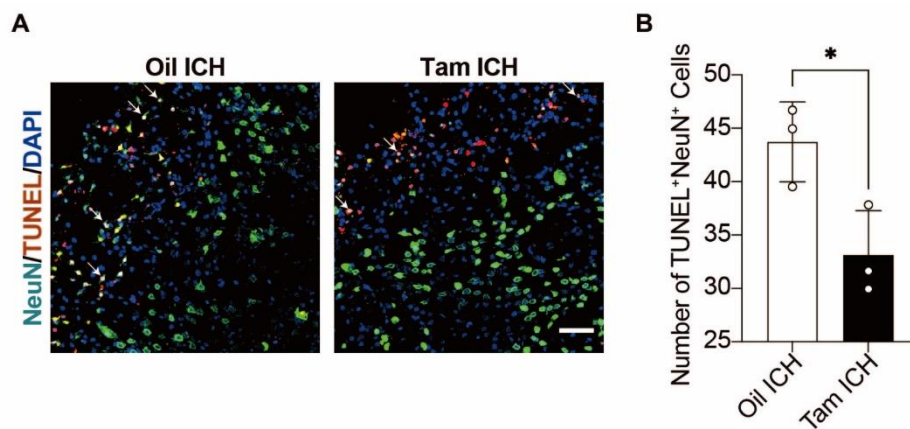

**A.** Representative immunostaining images of NeuN (green) and TUNEL (red) in the hemorrhagic perifocal area at day 3 of ICH in Oil ICH and Tam ICH groups. Scale bar = 50  $\mu$ m. Arrows indicated the colocalization of NeuN with TUNEL. **B.** Number of apoptotic neurons in the hemorrhagic perifocal area at day 3 of ICH in Oil ICH and Tam ICH groups.  $n = 3$  mice per group (all male). Two-sided, unpaired Student's test. All data are presented as mean  $\pm$  SD. \* $p < 0.05$ .

**Supplementary Figure 9. Viability of bEnd.3 cells that treated with EGTA and co-cultured with CD8<sup>+</sup> T cells.**

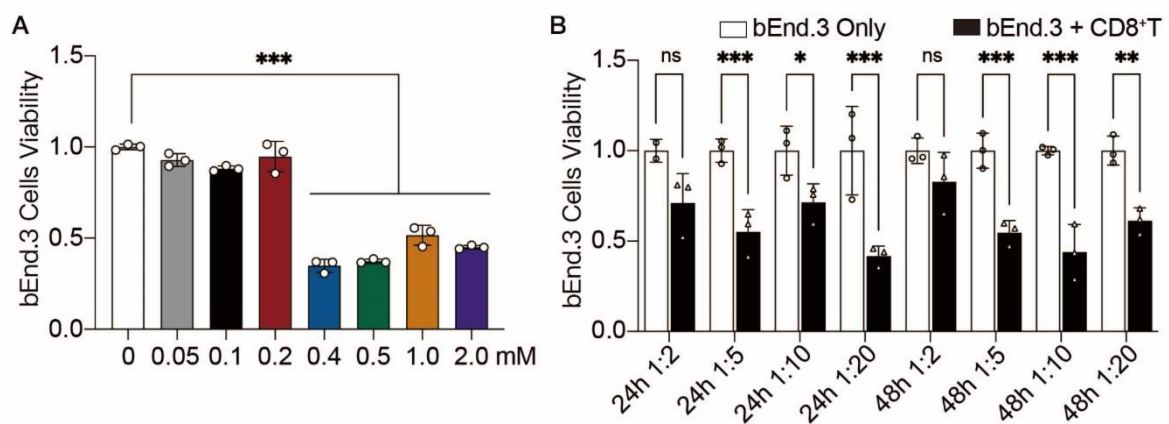

**A.** Viability of bEnd.3 cells treated with different concentration of EGTA for 24 h.  $n = 3$  biologically independent bEnd.3 cell cultures. One-way ANOVA with Tukey's multiple comparisons test. **B.** Viability of bEnd.3 cells co-cultured with CD8<sup>+</sup> T cells at cell ratios of 1:2, 1:5, 1:10 and 1:20 for 24h and 48h. Two-way ANOVA with Bonferroni multiple comparisons test.  $n = 3$  biologically independent bEnd.3 cell cultures. All data are presented as mean  $\pm$  SD. \* $p < 0.05$ , \*\* $p < 0.01$ , \*\*\* $p < 0.001$ , ns, no significance.

**Supplementary Figure 10. Raw data of western blot**

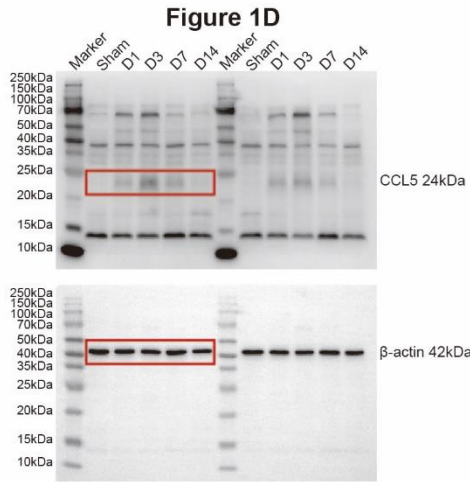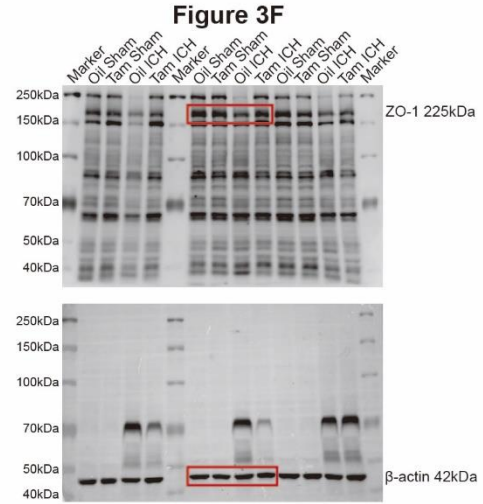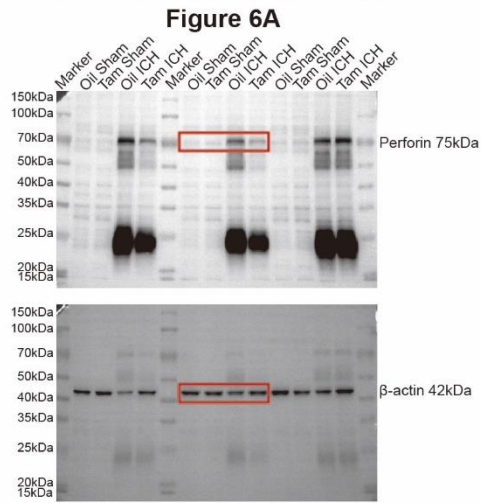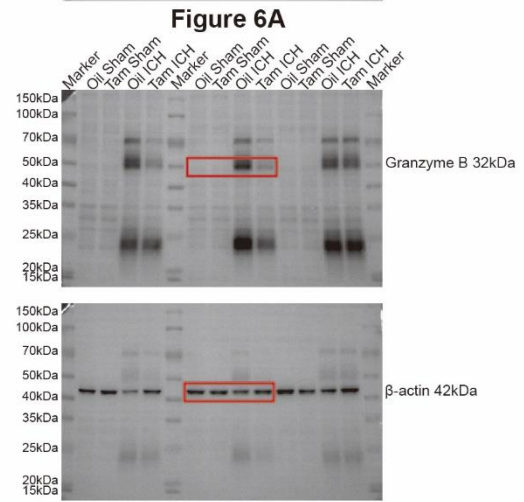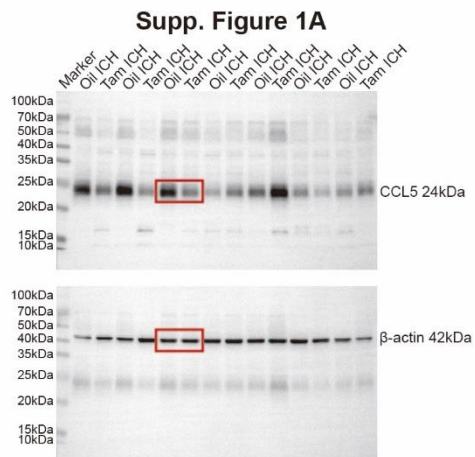

Supplement: sj-pdf-1-jcb-10.1177_0271678X231214838.pdf [file sj-pdf-1-jcb-10.1177_0271678X231214838.pdf]
